# Supplementary material for: Srs2 binding to proliferating cell nuclear antigen (PCNA) and its sumoylation contribute to replication protein A (RPA) antagonism during the DNA damage response
Source: eLife journal article supplement (doi:10.7554/elife.98843), 2024-06-14

The blots are overlaid with Ponceau staining to indicate molecular weight. Black squares mark the lanes shown in the figure.

**A**

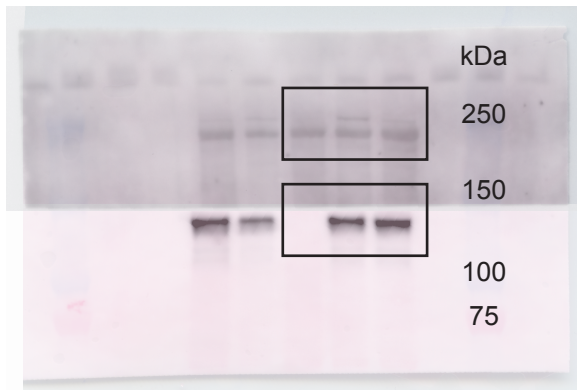

**D**

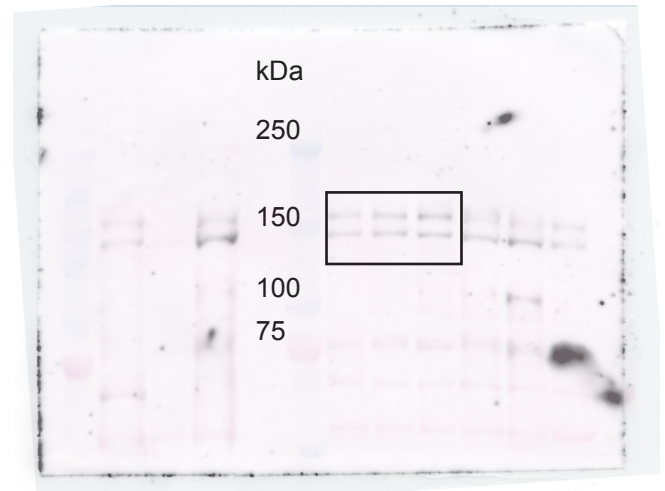

Supplement: fig6-figsupp1-data1 [file elife-98843-fig6-figsupp1-data1-v1.pdf]
